# Supplementary material for: High Expression of Pd-1 in Circulating Cells of Patients With Advanced Colorectal Cancer Receiving Adjuvant Therapy
Source: PubMed Central journal article supplement — Technol Cancer Res Treat. 2020 Nov 6;19:1533033820969446. doi: 10.1177/1533033820969446 (PMC7658510; doi:10.1177/1533033820969446), 2020-11-06
Supplement: TCRT-20-0339.R1_Supplimentary_file_blinded.pdf [file TCRT-20-0339.R1_Supplimentary_file_blinded.pdf]

**Supplementary materials for High expression of PD-1 in circulating cells of patients with advanced colorectal cancer receiving adjuvant therapy**

1 **This file includes:**

2

3 Table SI

4

5

6

7

8

9

10

11

12

13

14

15

16

17

18

19

20

21

22

23

24

25

26

27 Table SI. Tested immune genes with their details.

| <b>Immune Gene Symbol</b> | <b>Synonym (s)</b>                                  | <b>Cytogenetic Band</b> | <b>Roles in Immunity</b>                                                                                                                                                                                                                                                                                                                                                                                                                                                        |
|---------------------------|-----------------------------------------------------|-------------------------|---------------------------------------------------------------------------------------------------------------------------------------------------------------------------------------------------------------------------------------------------------------------------------------------------------------------------------------------------------------------------------------------------------------------------------------------------------------------------------|
| IFN $\gamma$              | Interferon-gamma;<br>IFG; IFI                       | 12q15                   | IFN $\gamma$ is related to high susceptibility to different infections and to several autoimmune diseases <sup>12</sup> . IFN- $\gamma$ -driven tumor microenvironment shows a better prognostic result in the tumor <sup>3</sup> . It induces Class II major histocompatibility complex (MHC) molecule expression and an activator of macrophages <sup>2,4</sup> .                                                                                                             |
| PD-1                      | Programmed cell death 1; CD279; hPD-1; CD279; SLEB2 | 2q37.3                  | In the human body, PD-1 functions in the regulation of the immune system's response to the cells. It works by increasing self-tolerance by suppressing the inflammatory activity of the T cell and down-regulation of the immune system <sup>5,6</sup> . Autoimmune diseases prevented by this gene. Besides, it prevents the immune system from killing cancer cells <sup>7-9</sup> . This gene is also expressed in pro-B-cells and may differentiate them <sup>10,11</sup> . |
| $\beta$ 2M                | beta-2 microglobulin;<br>Ly-m11; beta2m;<br>beta2-m | 15q21.1                 | Altered expression of $\beta$ 2M defines MMR-deficient cancers with a favorable clinical course in addition lack of metastatic diseases <sup>12-15</sup> .                                                                                                                                                                                                                                                                                                                      |
| CD3e                      | CD3e Molecule; T3E;<br>TCRE; IMD18                  | 11q23.3                 | CD3e is linked cell-surface proteins of the immunoglobulin superfamily. It contains a                                                                                                                                                                                                                                                                                                                                                                                           |

|        |                                                     |         |                                                                                                                                                                                                                                                                                                                         |
|--------|-----------------------------------------------------|---------|-------------------------------------------------------------------------------------------------------------------------------------------------------------------------------------------------------------------------------------------------------------------------------------------------------------------------|
|        |                                                     |         | domain of single extracellular immunoglobulin <sup>16-19</sup> .                                                                                                                                                                                                                                                        |
| CD28   | CD28 molecule; Tp44                                 | 2q33.2  | For cytokine production, T-cell survival and proliferation and T-helper type-2 development, the protein encoded this gene is required <sup>20,21</sup> . This gene belongs to a family and that creates a dynamic network which modulates immune response's initiation, maintenance, and termination <sup>22-24</sup> . |
| HLA-A  | Major histocompatibility complex, class I, A        | 6p22.1  | HLA-A presents vaccinia virus antigens to T cells, thus initiates adaptive immune responses <sup>25,26</sup> .                                                                                                                                                                                                          |
| ICAM 1 | Intercellular adhesion molecule 1; CD54; P3.58; BB2 | 19p13.2 | ICAM 1 gene translates a glycoprotein in the cell surface. Expression of this glycoprotein normally happens on cells of the immune system and endothelial cells <sup>27-29</sup> .                                                                                                                                      |

28

29

### 30 References

- 31 1. Deniz R, Tulunay-Virlan A, Ture Ozdemir F, et al. Th17-Inducing Conditions Lead to  
32 in vitro Activation of Both Th17 and Th1 Responses in Behcet's Disease. *Immunol*  
33 *Invest.* 2017;46(5):518-525. doi:10.1080/08820139.2017.1306865
- 34 2. Mojic M, Takeda K, Hayakawa Y. The Dark Side of IFN- $\gamma$ : Its Role in Promoting  
35 Cancer Immuno-evasion. *Int J Mol Sci.* 2017;19(1):89. doi:10.3390/ijms19010089
- 36 3. Grenz S, Naschberger E, Merkel S, et al. IFN- $\gamma$ -Driven Intratumoral  
37 Microenvironment Exhibits Superior Prognostic Effect Compared with an IFN- $\alpha$ -  
38 Driven Microenvironment in Patients with Colon Carcinoma. *Am J Pathol.*  
39 2013;183(6):1897-1909. doi:10.1016/j.ajpath.2013.08.025
- 40 4. Kosmidis C, Sapalidis K, Koletsa T, et al. Interferon- $\gamma$  and Colorectal Cancer: an up-to

- 41 date. *J Cancer*. 2018;9(2):232-238. doi:10.7150/jca.22962
- 42 5. Champiat S, Dercle L, Ammari S, et al. Hyperprogressive Disease Is a New Pattern of  
43 Progression in Cancer Patients Treated by Anti-PD-1/PD-L1. *Clin Cancer Res*.  
44 2017;23(8):1920-1928. doi:10.1158/1078-0432.CCR-16-1741
- 45 6. Syn NL, Teng MWL, Mok TSK, Soo RA. De-novo and acquired resistance to immune  
46 checkpoint targeting. *Lancet Oncol*. 2017;18(12):e731-e741. doi:10.1016/S1470-  
47 2045(17)30607-1
- 48 7. Weber J. Immune Checkpoint Proteins: A New Therapeutic Paradigm for Cancer—  
49 Preclinical Background: CTLA-4 and PD-1 Blockade. *Semin Oncol*. 2010;37(5):430-  
50 439. doi:10.1053/J.SEMINONCOL.2010.09.005
- 51 8. Fife BT, Pauken KE. The role of the PD-1 pathway in autoimmunity and peripheral  
52 tolerance. *Ann N Y Acad Sci*. 2011;1217(1):45-59. doi:10.1111/j.1749-  
53 6632.2010.05919.x
- 54 9. Francisco LM, Sage PT, Sharpe AH. The PD-1 pathway in tolerance and  
55 autoimmunity. *Immunol Rev*. 2010;236(1):219-242. doi:10.1111/j.1600-  
56 065X.2010.00923.x
- 57 10. Mojtahedi Z, Mohmedi M, Rahimifar S, Erfani N, Hosseini SV, Ghaderi A.  
58 Programmed death-1 gene polymorphism (PD-1.5 C/T) is associated with colon  
59 cancer. *Gene*. 2012;508(2):229-232. doi:10.1016/j.gene.2012.07.059
- 60 11. Zhao Y, Mao Z, Pang H, et al. Association of programmed cell death 1 (PDCD1) gene  
61 polymorphisms with colorectal cancer among Han Chinese population. *Zhonghua Yi*  
62 *Xue Yi Chuan Xue Za Zhi*. 2018;35(2):219-223. doi:10.3760/cma.j.issn.1003-  
63 9406.2018.02.016
- 64 12. Kloor M, Michel S, Buckowitz B, et al. Beta2-microglobulin mutations in  
65 microsatellite unstable colorectal tumors. *Int J Cancer*. 2007;121(2):454-458.  
66 doi:10.1002/ijc.22691
- 67 13. Shrout J, Yousefzadeh M, Dodd A, et al.  $\beta$  2 microglobulin mRNA expression levels  
68 are prognostic for lymph node metastasis in colorectal cancer patients. *Br J Cancer*.  
69 2008;98(12):1999-2005. doi:10.1038/sj.bjc.6604399
- 70 14. Koelzer VH, Baker K, Kassahn D, Baumhoer D, Zlobec I. Prognostic impact of  $\beta$ -2-  
71 microglobulin expression in colorectal cancers stratified by mismatch repair status. *J*  
72 *Clin Pathol*. 2012;65(11):996-1002. doi:10.1136/jclinpath-2012-200742
- 73 15. Pereira C, Gimenez-Xavier P, Pros E, et al. Genomic Profiling of Patient-Derived  
74 Xenografts for Lung Cancer Identifies *B2M* Inactivation Impairing  
75 Immunorecognition. *Clin Cancer Res*. 2017;23(12):3203-3213. doi:10.1158/1078-  
76 0432.CCR-16-1946
- 77 16. Upreti D, Zhang M, Bykova E, Kung SKP, Pathak KA. Change in CD3 $\zeta$ -chain  
78 expression is an independent predictor of disease status in head and neck cancer  
79 patients. *Int J Cancer*. 2016;139(1):122-129. doi:10.1002/ijc.30046
- 80 17. Soudais C, de Villartay J-P, Le Deist F, Fischer A, Lisowska-Gros-pierre B.  
81 Independent mutations of the human CD3- $\epsilon$  gene resulting in a T cell receptor/CD3

- 82 complex immunodeficiency. *Nat Genet.* 1993;3(1):77-81. doi:10.1038/ng0193-77
- 83 18. Prado-Garcia H, Aguilar-Cazares D, Meneses-Flores M, Morales-Fuentes J, Lopez-  
84 Gonzalez JS. Lung carcinomas do not induce T-cell apoptosis via the Fas/Fas ligand  
85 pathway but down-regulate CD3 epsilon expression. *Cancer Immunol Immunother.*  
86 2008;57(3):325-336. doi:10.1007/s00262-007-0372-6
- 87 19. Yang X, Liu Y, Zheng D. Overexpression of Bcl-2 inhibited T lymphocyte apoptosis  
88 mediated by CD3 epsilon molecule. *Zhongguo Yi Xue Ke Xue Yuan Xue Bao.*  
89 1999;21(6):421-424. <http://www.ncbi.nlm.nih.gov/pubmed/12567487>. Accessed  
90 September 13, 2018.
- 91 20. Bromley SK, Iaboni A, Davis SJ, et al. The immunological synapse and CD28-CD80  
92 interactions. *Nat Immunol.* 2001;2(12):1159-1166. doi:10.1038/ni737
- 93 21. Tavano R, Contento RL, Baranda SJ, et al. CD28 interaction with filamin-A controls  
94 lipid raft accumulation at the T-cell immunological synapse. *Nat Cell Biol.*  
95 2006;8(11):1270-1276. doi:10.1038/ncb1492
- 96 22. Lee H, Kim JH, Yang SY, et al. Peripheral blood gene expression of B7 and CD28  
97 family members associated with tumor progression and microscopic lymphovascular  
98 invasion in colon cancer patients. *J Cancer Res Clin Oncol.* 2010;136(9):1445-1452.  
99 doi:10.1007/s00432-010-0800-4
- 100 23. Liaskou E, Jeffery LE, Trivedi PJ, et al. Loss of CD28 Expression by Liver-Infiltrating  
101 T Cells Contributes to Pathogenesis of Primary Sclerosing Cholangitis.  
102 *Gastroenterology.* 2014;147(1):221-232.e7. doi:10.1053/j.gastro.2014.04.003
- 103 24. Pagès F, Ragueneau M, Rottapel R, et al. Binding of phosphatidylinositol-3-OH  
104 kinase to CD28 is required for T-cell signalling. *Nature.* 1994;369(6478):327-329.  
105 doi:10.1038/369327a0
- 106 25. Menon AG, Morreau H, Tollenaar RAEM, et al. Down-Regulation of HLA-A  
107 Expression Correlates with a Better Prognosis in Colorectal Cancer Patients. *Lab*  
108 *Investig.* 2002;82(12):1725-1733. doi:10.1097/01.LAB.0000043124.75633.ED
- 109 26. Ovsyannikova IG, Pankratz VS, Salk HM, Kennedy RB, Poland GA. HLA alleles  
110 associated with the adaptive immune response to smallpox vaccine: a replication study.  
111 *Hum Genet.* 2014;133(9):1083-1092. doi:10.1007/s00439-014-1449-x
- 112 27. Wang Q, Li B, Liu B, et al. Polymorphisms of the ICAM-1 exon 6 (E469K) are  
113 associated with differentiation of colorectal cancer. *J Exp Clin Cancer Res.*  
114 2009;28(1):139. doi:10.1186/1756-9966-28-139
- 115 28. Novikov V V., Shumilova S V., Novikov D V., Kalugin A V., Fomina SG, Karaulov A  
116 V. Genetic Instability in Locus rs5498 E469K (A/G) of ICAM-1 Gene in Patients with  
117 Colorectal Cancer and Breast Cancer. *Bull Exp Biol Med.* 2016;160(6):811-813.  
118 doi:10.1007/s10517-016-3316-3
- 119 29. Liu L-B, Liu T, Xin F-Z. Correlations of ICAM-1 gene polymorphisms with  
120 susceptibility and multidrug resistance in colorectal cancer in a Chinese population.  
121 *Medicine (Baltimore).* 2017;96(33):e7481. doi:10.1097/MD.00000000000007481
